# Supplementary material
Source: PubMed Central journal article supplement (PMC2872460)
Supplement: 1002175107_pnas.201002175SI.pdf [file 1002175107_pnas.201002175SI.pdf]

# Supporting Information

de Feraudy et al. 10.1073/pnas.1002175107

## SI Materials and Methods

**Cells.** Cells were cultured in Eagle's minimal essential media with Earle's balanced salt solution supplemented with 10% FBS, 10  $\mu\text{g}/\text{mL}$  streptomycin, 10 units/mL penicillin, 0.292 g/L glutamine, and 25  $\mu\text{g}/\text{mL}$  blasticidin. Cells were maintained between 50% and 90% confluency, passaged 24–48 h before use, and grown at 37 °C in 5%  $\text{CO}_2$ . Cells were grown to 75% confluency and used in the exponential growth phase.

**Irradiation and Drug Treatment.** Cells were exposed either to ionizing radiation from a  $^{137}\text{Cs}$  source or UV-C light (254 nm at a fluency of 2.65  $\text{J}/\text{m}^{-2}$  per s). Cells were treated with 50  $\mu\text{M}$  wortmannin, 100  $\mu\text{M}$  SP600125, 50  $\mu\text{M}$  KU55933, 2 mM caffeine, and 1  $\mu\text{M}$  carbobenzoxy-valyl-alanyl-aspartyl-[O-methyl]-fluoromethylketone (ZVAD) immediately after irradiation and during subsequent incubations.

**Western Blot.** Cells were washed with PBS and lysed using radioimmunoprecipitation (RIPA) buffer [150 mM NaCl, 1% (vol/vol) Nonidet P-40, 0.5% (wt/vol) sodium deoxycholate, and 0.1% (wt/vol) SDS in 50 mM Tris-HCl (pH 8.0)] supplemented with protease (1836153; Roche) and phosphatase inhibitors (78420; Pierce) according to the manufacturer's protocol. Protein concentrations were determined using the BCA Protein Assay Kit (23225; Pierce). Total protein in 1 $\times$  Laemmli buffer with 10% 2-mercaptoethanol was separated by SDS/PAGE, transferred overnight to a PVDF membrane (IPVH00010; Millipore) by electroblotting with 20% (vol/vol) methanol for low molecular weight and 5% (vol/vol) for high molecular weight proteins, and blocked for 1 h in 5% (wt/vol) dry milk/Tris buffered saline/0.1% (vol/vol) Tween-20. Membranes were incubated overnight at 4 °C with primary antiserum followed by incubation with a horseradish peroxidase-conjugated secondary antiserum for 1 h, and they were developed using enhanced chemiluminescence (32106; Pierce or 64–201BP; Millipore). JNK (9252), phospho-JNK (9251), ATM (2873), and phospho-H2AX Ser139 (2577) antibodies were purchased from Cell Signaling, beta-actin (A5441) was from Sigma, and phospho-ATM Ser1981 (05-740) was from Upstate. The xeroderma pigmentosum complementation group C protein (XPC) antibody was courtesy of Wim Vermeulen and Jan Hoeijmakers (Rotterdam, The Netherlands).

**Flow Cytometry.** Detection of cellular histone variant H2AX phosphorylated on serine 139 ( $\gamma\text{H2AX}$ ) was carried out using the H2AX phosphorylation assay kit for flow cytometry (Upstate Biotechnology). The assay was carried out according to the manufacturer's instructions with one modification: the FITC-labeled antibody was incubated overnight at 4 °C instead of 20 min on ice. Cells were suspended in flow buffer ( $\text{Ca}^{2+}$ - and  $\text{Mg}^{2+}$ -free 1 $\times$  PBS with 1% BSA containing 10  $\mu\text{g}/\text{mL}$  PI and 100  $\mu\text{g}/\text{mL}$  RNaseA) and analyzed using a FACS Caliber Flow Cytometer (Becton Dickinson) equipped with CELL QUEST. Data were analyzed using both CELL QUEST and FLOJO software (Tree Star).

**Immunofluorescence Microscopy.** Cells were grown on dual-chambered slides (Nalge Nunc), fixed with 4% paraformaldehyde for 10 min, and permeabilized with 0.2% Triton X-100 for 5 min. Cells used for 53BP1 IF were fixed with 100% methanol for 20 min. Slides were either directly processed or air-dried for 5 min and stored at  $-80$  °C. After storage/methanol fixation, slides were re-permeabilized with  $-20$  °C 50:50 acetone:methanol for 20 min, blocked in PBS, 10% FBS, and 1% BSA for 1 h at 37 °C, and incubated overnight at 4 °C with the following primary antibodies: mouse monoclonal  $\gamma\text{H2AX}$  (Ser-139), 1:1,000 (Upstate Biotechnology); rabbit polyclonal  $\gamma\text{H2Ax}$  (Ser-139), 1:1,000 (Novus Biologicals); rabbit polyclonal 53BP1, 1:300 (#4937; Cell Signaling); anti-phospho-Chk2 (Thr68; #2661; Cell Signaling); and anti-proliferating cell nuclear antigen, 1:200 (FL-261; SC7907; Santa Cruz). Secondary antibodies labeled with Alexa 488 or Alexa 555 (Molecular Probes) were added at 1:1,000, and slides were incubated at 37 °C for 1 h. Slides were mounted with ProLong Gold Antifade reagent containing DAPI (Molecular Probes). Images were acquired at room temperature with a Zeiss Axioplan 2 microscope equipped with a 100 $\times$  Zeiss Plan-NEOFLUAR 1.3 Oil objective lens and a Zeiss Axiocam color camera under the control of AXIOVISION 4.2 software. Image processing with PHOTOSHOP 6.0 (Adobe Systems) was applied to whole images only. Images used for comparison between different treatments and/or cell lines were acquired with the same instrument settings and exposure times, and they were processed equally.
